# Supplementary material
Source: PubMed Central journal article supplement (PMC4691684)
Supplement: supp_WNL.0000000000002219_Appendix_e-1.pdf [file supp_WNL.0000000000002219_Appendix_e-1.pdf]

## Wernicke's Area: Modern Evidence and a Reinterpretation

### *Supplemental Materials*

**Figure 2A Data: Phonological Retrieval Studies With Minimal Semantic or Auditory Processing Confounds**

| Ref                                               | Phonological Retrieval Condition             | Control                                              | <i>Talairach Peak</i> |     |    |
|---------------------------------------------------|----------------------------------------------|------------------------------------------------------|-----------------------|-----|----|
|                                                   |                                              |                                                      | X                     | Y   | Z  |
| <i>Pseudoword Reading</i>                         |                                              |                                                      |                       |     |    |
| 1                                                 | Read aloud visual pseudowords                | Say "hiya" in response to consonant strings          | -60                   | -22 | 4  |
| 2                                                 | 1-Back rhyme matching of visual pseudowords  | 1-Back color matching of unfamiliar letter strings   | -33                   | -52 | 33 |
| 3                                                 | Pseudoword rhyme matching to previous target | Detect boldface letters in unfamiliar letter strings | -53                   | -45 | 24 |
| 4                                                 | 1-Back rhyme matching of visual pseudowords  | 1-Back visual matching on "barcode" stimuli          | -52                   | -43 | 3  |
| <i>Word Reading</i>                               |                                              |                                                      |                       |     |    |
| 5                                                 | Rhyme matching on visual words               | Letter (visual) matching on visual words             | -54                   | -43 | 21 |
|                                                   |                                              |                                                      | -60                   | -31 | 14 |
| 6                                                 | Rhyme matching on words or pseudowords       | Visual matching on false font characters or tones    | -60                   | -43 | 14 |
| <i>Phonological Priming</i>                       |                                              |                                                      |                       |     |    |
| 7                                                 | Lexical decision with unrelated prime        | Lexical decision with phonological prime             | -53                   | -54 | 22 |
| 8                                                 | Lexical decision with unrelated prime        | Lexical decision with phonological prime             | -48                   | -31 | 4  |
|                                                   |                                              |                                                      | -60                   | -57 | 15 |
| <i>Frequency Effect in Phonological Retrieval</i> |                                              |                                                      |                       |     |    |
| 9                                                 | Read pseudowords silently                    | Read words silently                                  | -59                   | -35 | 0  |
| 10                                                | Name aloud pictures with low-frequency names | Name aloud pictures with high-frequency names        | -51                   | -37 | 20 |
| 11                                                | Name aloud pictures with low-frequency names | Name aloud pictures with high-frequency names        | -61                   | -35 | 22 |
| <i>Phonological Memory Maintenance</i>            |                                              |                                                      |                       |     |    |
| 12                                                | Silently rehearse pseudoword sentences       | Rest                                                 | -51                   | -46 | 16 |
|                                                   |                                              |                                                      | -54                   | -39 | 20 |
|                                                   |                                              |                                                      | -59                   | -30 | 0  |
| 13                                                | Silently rehearse word pairs                 | Rest                                                 | -60                   | -15 | -1 |
|                                                   |                                              |                                                      | -53                   | -35 | 21 |
| 14                                                | Silently rehearse pseudoword pairs           | Rest                                                 | -35                   | -44 | 5  |
|                                                   |                                              |                                                      | -51                   | -44 | 5  |

## References

1. Herbster AN, Mintun MA, Nebes RD, Becker JT. Regional cerebral blood flow during word and nonword reading. *Hum. Brain Mapp.* 1997;5:84-92.
2. Xu B, Grafman J, Gaillard WD, et al. Conjoint and extended neural networks for the computation of speech codes: The neural basis of selective impairment in reading words and pseudowords. *Cereb. Cortex* 2001;11:267-277.
3. Xu B, Grafman J, Gaillard WD, et al. Neuroimaging reveals automatic speech coding during perception of written word meaning. *Neuroimage* 2002;17:859-870.
4. Bruno JL, Zumberge A, Manis FR, Lu Z-L, Goldman JG. Sensitivity to orthographic familiarity in the occipito-temporal region. *Neuroimage* 2008;39:1988-2001.
5. Booth JR, Burman DD, Meyer JR, Gitelman DR, Parrish TB, Mesulam MM. Functional anatomy of intra- and cross-modal lexical tasks. *Neuroimage* 2002;16:7-22.
6. Burton MW, Locasto PC, Krebs-Noble D, Gullapalli RP. A systematic investigation of the functional neuroanatomy of auditory and visual phonological processing. *Neuroimage* 2005;26:647-661.
7. Chou T, Davis MH, Marslen-Wilson WD. Phonological priming in visual word recognition for english words: An event-related functional MRI study. *Chinese Journal of Psychology* 2006;48:1-18.
8. Wilson LB, Tregellas JR, Slason E, Pasko BE, Rojas DC. Implicit phonological priming during visual word recognition. *Neuroimage* 2011;55:724-731.
9. Kronbichler M, Hutzler F, Wimmer H, Mair A, Staffen W, Ladurner G. The visual word form area and the frequency with which words are encountered: evidence from a parametric fMRI study. *Neuroimage* 2004;21:946-953.
10. Graves WW, Grabowski TJ, Mehta S, Gordon JK. A neural signature of phonological access: Distinguishing the effects of word frequency from familiarity and length in overt picture naming. *J. Cogn. Neurosci.* 2007;19:617-631.
11. Wilson SM, Isenberg AK, Hickok G. Neural correlates of word production stages delineated by parametric modulation of psycholinguistic variables. *Hum. Brain Mapp.* 2009;30:3596-3608.
12. Hickok G, Buchsbaum B, Humphries C, Muftuler T. Auditory-motor interaction revealed by fMRI: Speech, music, and working memory in area Spt. *J. Cogn. Neurosci.* 2003;15:673-682.
13. Buchsbaum BR, Olsen RK, Koch P, Berman KF. Human dorsal and ventral auditory streams subserve rehearsal-based and echoic processes during verbal working memory. *Neuron* 2005;48:687-697.
14. Strand F, Forssberg H, Klingberg T, Norrelgen F. Phonological working memory with auditory presentation of pseudo-words -- an event related fMRI study. *Brain Res.* 2008;1212:48-54.
